# Supplementary material
Source: Research Square preprint supplement (doi:10.21203/rs.3.rs-10313086/v1)
Supplement: Supplementary file 2 [file b69daaf5bd1a6f23515e6cb0.docx]

**Supplementary materials**

| Supplementary table 1. Within-group intervention effects for blood parameters | | | |  |
| --- | --- | --- | --- | --- |
|  | Group | Baseline | Week 8 | p-value |
| **Oral Glucose Tolerance Test (OGTT)** |  |  |  |  |
| Glucose tAUC  (mmol/L*120min) | PA | 826 ± 46 | 798 ± 55 | 0.421 |
| PA-SB | 762 ± 45 | 780 ± 52 | 0.465 |
| Insulin tAUC | PA | **50690 ± 6001** | **38813 ± 5255** | **0.046** |
| (pmol/L*120min) | PA-SB | 42211 ± 5863 | 42281 ± 4977 | 0.980 |
| WBISI | PA | **7.6 ± 1.1** | **9.5 ± 1.6** | **0.037** |
| PA-SB | 7.3 ± 1.1 | 7.9 ± 1.5 | 0.486 |
| IGI | PA | 166 ± 38 | 128 ± 28 | 0.285 |
| PA-SB | 162 ± 38 | 159 ± 27 | 0.818 |
| **Fasting blood markers** |  |  |  |  |
| HOMA-IR | PA | 1.15 ± 0.17 | 1.25 ± 0.17 | 0.387 |
|  | PA-SB | 1.28 ± 0.16 | 1.33 ± 0.17 | 0.621 |
| HOMA B (%) | PA | 67.7 ± 8.4 | 73.0 ± 8.9 | 0.491 |
| PA-SB | 73.8 ± 8.1 | 74.4 ± 8.6 | 0.913 |
| HOMA S (%) | PA | 118.7 ± 14.3 | 108.7 ± 22.5 | 0.641 |
| PA-SB | 93.1 ± 13.8 | 103.6 ± 21.2 | 0.501 |
| Total cholesterol (mmol/L) | PA | 4.8 ± 0.3 | 4.3 ± 0.3 | 0.106 |
| PA-SB | 4.7 ± 0.3 | 4.6 ± 0.3 | 0.766 |
| HDL cholesterol (mmol/L) | PA | 1.3 ± 0.1 | 1.4 ± 0.1 | 0.497 |
| PA-SB | 1.4 ± 0.1 | 1.4 ± 0.1 | 0.578 |
| LDL cholesterol (mmol/L) | PA | 3.0 ± 0.3 | 2.6 ± 0.2 | 0.071 |
| PA-SB | 2.8 ± 0.2 | 2.7 ± 0.2 | 0.710 |
| Triglycerides (mmol/L) | PA | 1.0 ± 0.1 | 0.9 ± 0.1 | 0.142 |
| PA-SB | 1.0 ± 0.1 | 1.1 ± 0.1 | 0.285 |
| Glucose (mmol/L) | PA | 5.1 ± 0.1 | 5.1 ± 0.1 | 0.757 |
| PA-SB | 5.0 ± 0.1 | 5.0 ± 0.1 | 0.823 |
| Insulin (pmol/L) | PA | 35.6 ± 4.8 | 38.9 ± 5.0 | 0.397 |
| PA-SB | 38.4 ± 4.7 | 40.4 ± 4.8 | 0.651 |
| Data are expressed as mean ± SEM | | | |  |

**
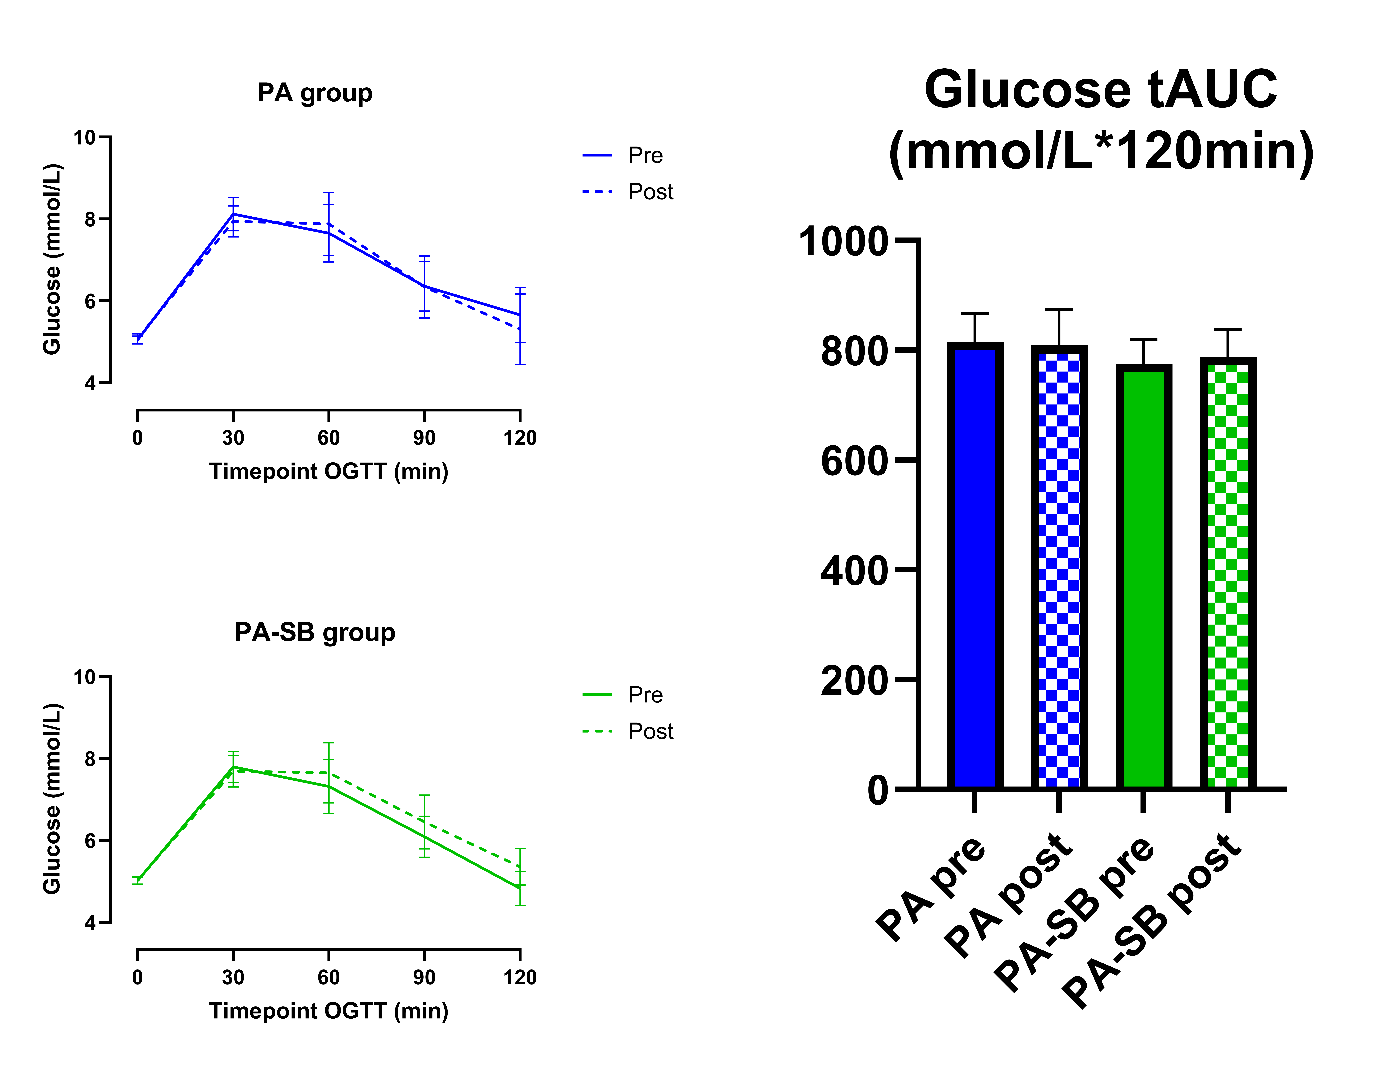
**

*Supplementary Figure 1: Glucose concentration per timepoint during oral glucose tolerance tests (OGTT) before and after the interventions presented for each intervention arm (left panels); Glucose total area under the curve (AUC) during the OGTT (right panel).*
